# Supplementary material for: One-step preparation of sulfur-doped porous g-C3N4 for enhanced visible light photocatalytic performance
Source: Royal Society of Chemistry journal article supplement (doi:10.1039/d0dt00299b), 2020-01-01
Supplement: d0dt00299b1.pdf [file d0dt00299b1.pdf]

## Supporting Information

One-step preparation of sulfur-doped porous g-C<sub>3</sub>N<sub>4</sub> for enhanced visible light  
photocatalytic performance

Xin Xiao,<sup>a</sup> Yihui Wang,<sup>b</sup> Qiu Bo,<sup>a</sup> Xingyou Xu<sup>\*,a,b</sup> and Dongen Zhang<sup>\*,b</sup>

a. School of Chemical Engineering, Nanjing University of Science and Technology,  
Nanjing 210094, China.

E-mail: xuxingyou007@163.com; zdewxm@aliyun.com

b. School of Chemical Engineering, Jiangsu Ocean University, Lianyungang 222005,  
China.

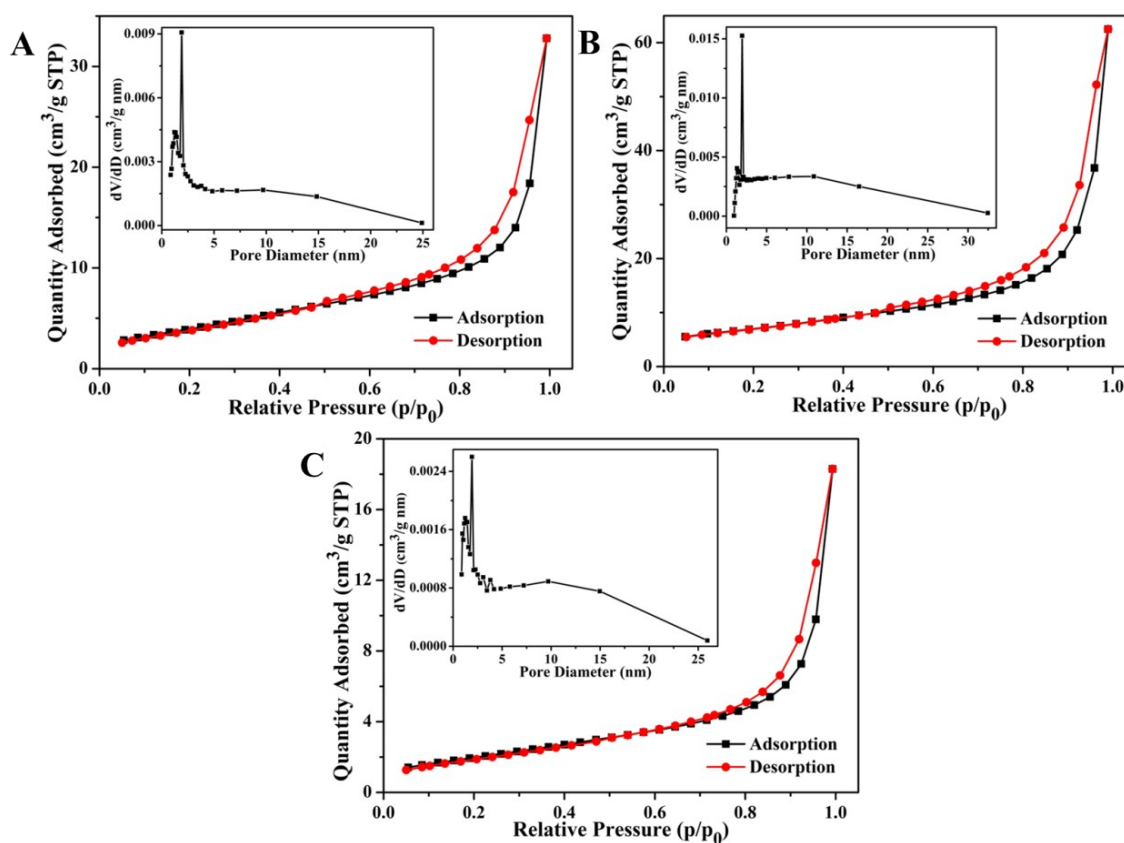

**Fig. S1** N<sub>2</sub> adsorption-desorption isotherms and the corresponding pore size distribution curves (inset) of (A) C<sub>3</sub>N<sub>4</sub>-S, (B) C<sub>3</sub>N<sub>4</sub>-T and (C) C<sub>3</sub>N<sub>4</sub>-M.

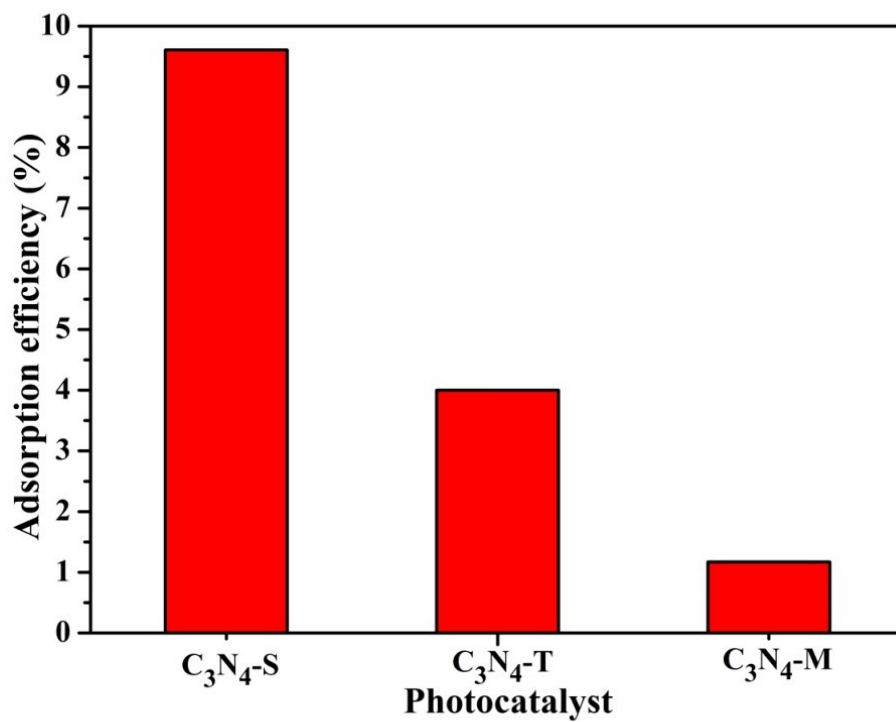

**Fig. S2** Adsorption efficiencies of RhB over different photocatalysts after 30 min in dark.

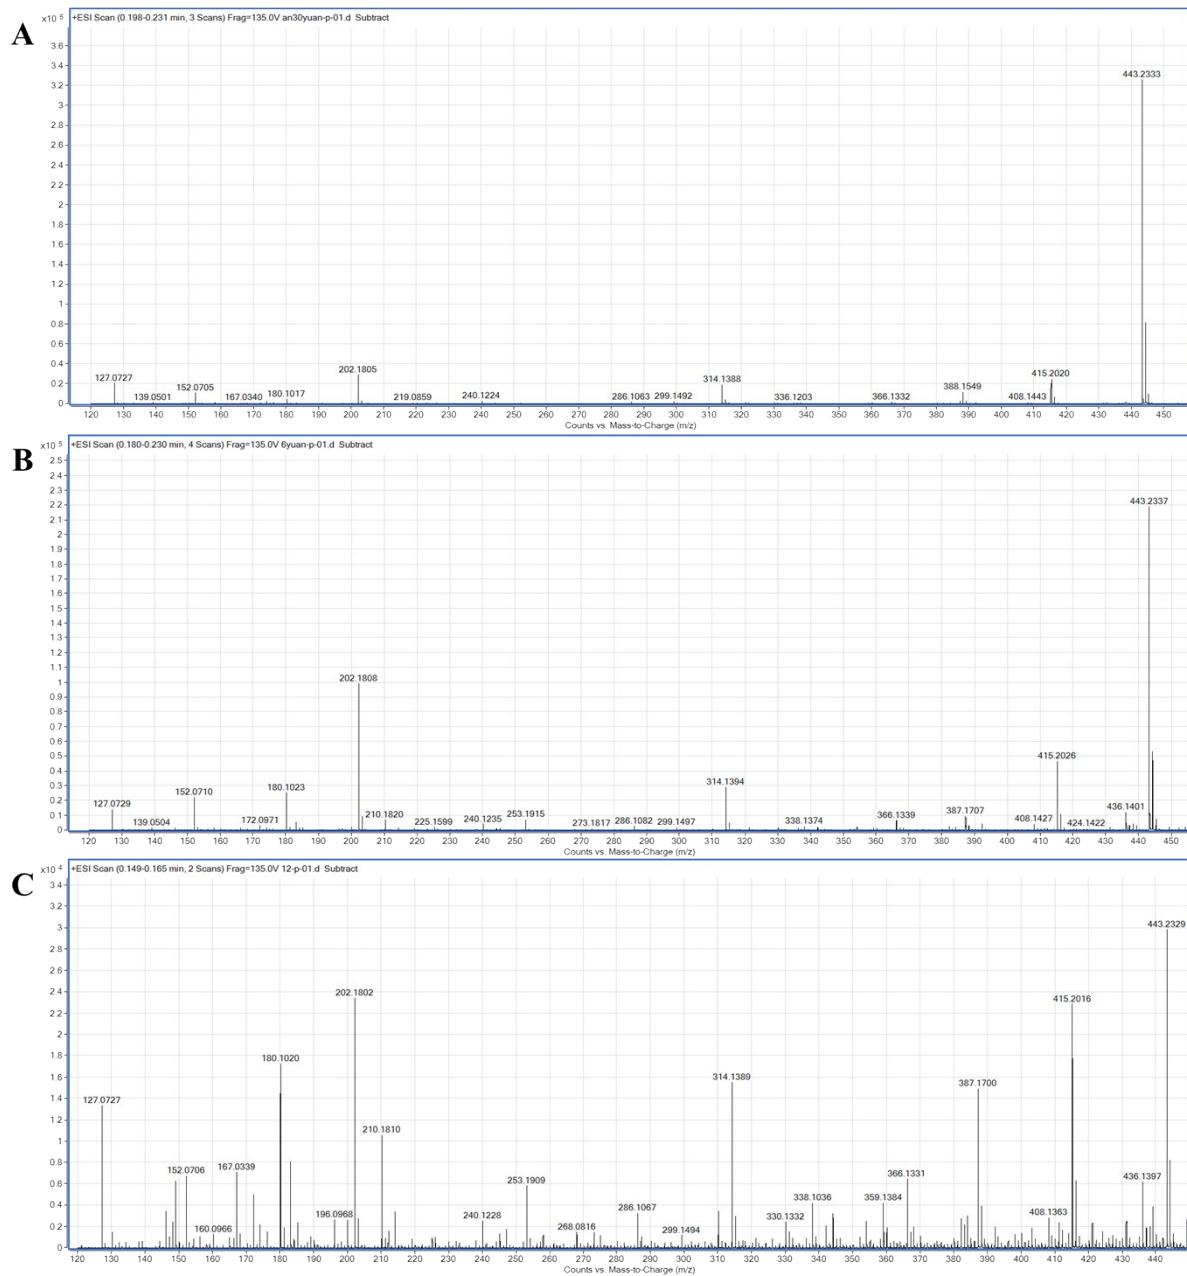

**Fig. S3** Time-dependent mass spectra of the species during RhB degradation (A) RhB solution after adsorption-desorption equilibrium in the dark, (B) 6 and (C) 12 min.
